# Supplementary material for: Healthcare workers’ knowledge, preparedness, counselling practices, and perceived barriers to confront COVID-19: A cross-sectional study from a war-torn country, Yemen
Source: PubMed Central journal article supplement (PMC7732096; doi:10.1371/journal.pone.0243962), 2020-12-11
Supplement: pone.0243962.s001.pdf [file pone.0243962.s001.pdf]

## Knowledge, preparedness, counselling practices, and perceived barriers among healthcare workers regarding the COVID-19

### Section one: Demographic characteristics

|                                                                                                                                                                                                                                                                                                                                                                                                                                                        |                                                                                                                                                                            |
|--------------------------------------------------------------------------------------------------------------------------------------------------------------------------------------------------------------------------------------------------------------------------------------------------------------------------------------------------------------------------------------------------------------------------------------------------------|----------------------------------------------------------------------------------------------------------------------------------------------------------------------------|
| <b>Age</b>                                                                                                                                                                                                                                                                                                                                                                                                                                             | .....                                                                                                                                                                      |
| <b>Gender</b>                                                                                                                                                                                                                                                                                                                                                                                                                                          | <input type="checkbox"/> Male<br><input type="checkbox"/> Female                                                                                                           |
| <b>Profession</b>                                                                                                                                                                                                                                                                                                                                                                                                                                      | <input type="checkbox"/> Physician <input type="checkbox"/> Pharmacist <input type="checkbox"/> Nurse <input type="checkbox"/> Physician- assistant                        |
| <b>Department</b>                                                                                                                                                                                                                                                                                                                                                                                                                                      | <input type="checkbox"/> ICU <input type="checkbox"/> Emergency <input type="checkbox"/> Internal medicine<br><input type="checkbox"/> Other departments (Please specify): |
| <b>Place of current work</b>                                                                                                                                                                                                                                                                                                                                                                                                                           | <input type="checkbox"/> Private hospital <input type="checkbox"/> Public hospital<br><input type="checkbox"/> Primary healthcare centre                                   |
| <b>1-Number of experience years</b>                                                                                                                                                                                                                                                                                                                                                                                                                    | .....                                                                                                                                                                      |
| <b>2-Did you attend any Workshops or courses related to the COVID-19 outbreak?</b>                                                                                                                                                                                                                                                                                                                                                                     | <input type="checkbox"/> Yes <input type="checkbox"/> No                                                                                                                   |
| <b>3-Have you ever been trained on control and prevention of COVID-19 outbreak?</b>                                                                                                                                                                                                                                                                                                                                                                    | <input type="checkbox"/> Yes <input type="checkbox"/> No                                                                                                                   |
| <b>4-Have you ever been trained on control and prevention of infectious diseases outbreak?</b>                                                                                                                                                                                                                                                                                                                                                         | <input type="checkbox"/> Yes <input type="checkbox"/> No                                                                                                                   |
| <b>5-Do you have previous experience in managing infectious disease outbreaks?</b>                                                                                                                                                                                                                                                                                                                                                                     | <input type="checkbox"/> Yes <input type="checkbox"/> No                                                                                                                   |
| <b>6-What is/are the main source/s of information for your knowledge about COVID-19 disease?</b>                                                                                                                                                                                                                                                                                                                                                       |                                                                                                                                                                            |
| <input type="checkbox"/> Media (e.g. TV, radio, Newspaper)<br><input type="checkbox"/> Your healthcare colleagues<br><input type="checkbox"/> Social applications and websites (Facebook, WhatsApp, Telegram and other Social apps)<br><input type="checkbox"/> Trusted medical websites (e.g., the World Health Organization, Medscape,...)<br><input type="checkbox"/> Scientific journals<br><input type="checkbox"/> Others (please specify):..... |                                                                                                                                                                            |

## Section two: Healthcare professionals' knowledge of COVID-19

|   |                                                                                                                                               |                              |                             |                                       |
|---|-----------------------------------------------------------------------------------------------------------------------------------------------|------------------------------|-----------------------------|---------------------------------------|
| 1 | COVID-19 is an infectious disease caused by a virus called severe acute respiratory syndrome coronavirus 2 (SARS-CoV-2)                       | <input type="checkbox"/> Yes | <input type="checkbox"/> No | <input type="checkbox"/> I don't know |
| 2 | The most common symptoms of COVID-19 are fever, tiredness, shortness of breath and dry cough                                                  | <input type="checkbox"/> Yes | <input type="checkbox"/> No | <input type="checkbox"/> I don't know |
| 3 | Older people, and those with underlying medical problems like heart problems or diabetes, are more likely to develop serious illness          | <input type="checkbox"/> Yes | <input type="checkbox"/> No | <input type="checkbox"/> I don't know |
| 4 | The disease spread from person to person through small droplets from the nose or mouth when a person with COVID-19 coughs, sneezes or exhales | <input type="checkbox"/> Yes | <input type="checkbox"/> No | <input type="checkbox"/> I don't know |
| 5 | There is a chance that people may get infected from asymptomatic COVID-19 patient                                                             | <input type="checkbox"/> Yes | <input type="checkbox"/> No | <input type="checkbox"/> I don't know |
| 6 | Studies indicate that the virus causing COVID-19 may remain alive on surfaces for a few hours to several days                                 | <input type="checkbox"/> Yes | <input type="checkbox"/> No | <input type="checkbox"/> I don't know |
| 7 | The time between catching the virus and beginning to have symptoms of the disease (incubation period) for COVID-19 range from 1-14 days       | <input type="checkbox"/> Yes | <input type="checkbox"/> No | <input type="checkbox"/> I don't know |
| 8 | The use of masks is crucial for health workers and people who are taking care of someone (at home or in a health care facility)               | <input type="checkbox"/> Yes | <input type="checkbox"/> No | <input type="checkbox"/> I don't know |
| 9 | Currently, there is no vaccine to prevent COVID-19 disease                                                                                    | <input type="checkbox"/> Yes | <input type="checkbox"/> No | <input type="checkbox"/> I don't know |

## Section three: Healthcare professionals' preparedness for COVID-19 outbreak

|   |                                                                                          |                              |                             |                                   |
|---|------------------------------------------------------------------------------------------|------------------------------|-----------------------------|-----------------------------------|
| 1 | I know all the relevant information related to COVID-19 disease.                         | <input type="checkbox"/> Yes | <input type="checkbox"/> No | <input type="checkbox"/> Not sure |
| 2 | I have read general guidance about COVID-19 (for example, WHO or CDC COVID-19 guidance). | <input type="checkbox"/> Yes | <input type="checkbox"/> No | <input type="checkbox"/> Not sure |
| 3 | I have read medical articles related to COVID-19 outbreak preparedness.                  | <input type="checkbox"/> Yes | <input type="checkbox"/> No | <input type="checkbox"/> Not sure |
| 4 | I can identify the signs and symptoms of COVID-19.                                       | <input type="checkbox"/> Yes | <input type="checkbox"/> No | <input type="checkbox"/> Not sure |
| 5 | I can manage the common symptoms of COVID-19.                                            | <input type="checkbox"/> Yes | <input type="checkbox"/> No | <input type="checkbox"/> Not sure |
| 6 | I have the skills to decide which patients should be managed first.                      | <input type="checkbox"/> Yes | <input type="checkbox"/> No | <input type="checkbox"/> Not sure |
| 7 | I can care for COVID-19 patients independently without any supervision.                  | <input type="checkbox"/> Yes | <input type="checkbox"/> No | <input type="checkbox"/> Not sure |

|    |                                                                                                                                                 |                              |                             |                                   |
|----|-------------------------------------------------------------------------------------------------------------------------------------------------|------------------------------|-----------------------------|-----------------------------------|
| 8  | I have participated in educational activities dealing with COVID-19 outbreak preparedness (continuing education classes, seminars, or courses). | <input type="checkbox"/> Yes | <input type="checkbox"/> No | <input type="checkbox"/> Not sure |
| 9  | I have the necessary knowledge and skills to educate patients about COVID-19 prevention practices.                                              | <input type="checkbox"/> Yes | <input type="checkbox"/> No | <input type="checkbox"/> Not sure |
| 10 | I am aware of all the challenges in my community that may hinder the response to the COVID-19                                                   | <input type="checkbox"/> Yes | <input type="checkbox"/> No | <input type="checkbox"/> Not sure |
| 11 | I know how and to whom COVID-19 cases should be reported.                                                                                       | <input type="checkbox"/> Yes | <input type="checkbox"/> No | <input type="checkbox"/> Not sure |
| 12 | I have participated in emergency planning for COVID-19 in my community                                                                          | <input type="checkbox"/> Yes | <input type="checkbox"/> No | <input type="checkbox"/> Not sure |
| 13 | In case of infectious disease outbreaks, I know how to use properly the personal protective equipment                                           | <input type="checkbox"/> Yes | <input type="checkbox"/> No | <input type="checkbox"/> Not sure |
| 14 | In case of infectious disease outbreaks, I know how to execute decontamination procedures.                                                      | <input type="checkbox"/> Yes | <input type="checkbox"/> No | <input type="checkbox"/> Not sure |
| 15 | In case of emergency, I know how to perform isolation procedures to minimize the risks of community exposure.                                   | <input type="checkbox"/> Yes | <input type="checkbox"/> No | <input type="checkbox"/> Not sure |

| <b>Section four: Healthcare professionals' practices of counselling patients regarding COVID-19 prevention measures</b> |                                                                                                                        |       |        |           |         |        |
|-------------------------------------------------------------------------------------------------------------------------|------------------------------------------------------------------------------------------------------------------------|-------|--------|-----------|---------|--------|
|                                                                                                                         |                                                                                                                        | Never | Rarely | Sometimes | Usually | Always |
| 1                                                                                                                       | Do you educate the patients and the people around you about the risk of COVID-19?                                      |       |        |           |         |        |
| 2                                                                                                                       | Do you educate the patients and the people around you about the symptoms, signs, and mode of transmission of COVID-19? |       |        |           |         |        |
| 3                                                                                                                       | Do you educate the patients and the people around you about the preventative measures of COVID-19?                     |       |        |           |         |        |

|   |                                                                                                                                                    |  |  |  |  |  |
|---|----------------------------------------------------------------------------------------------------------------------------------------------------|--|--|--|--|--|
| 4 | Do you advise the patients and the people around you to avoid public gatherings (such as khat sessions, weddings, malls, markets, and restaurants) |  |  |  |  |  |
| 5 | Do you educate the patients and the people around you about the importance of handwashing before touching their eyes, nose, or mouth?              |  |  |  |  |  |
| 6 | Do you educate the patients and the people around you on what to do if they developed similar symptoms and signs to COVID-19 disease               |  |  |  |  |  |

**Section five: Perceived barriers for adequate COVID-19 prevention and control in Yemen**

*In this section, please select all the factors that you think as a healthcare worker could lead to improper control of the disease in Yemen (please choose all that apply):*

- Insufficient knowledge among healthcare providers regarding the COVID-19 and its precautionary practices
- Lack of awareness among the public population of the preventive measures for COVID-19
- Lack of educational programs and training for healthcare providers on infectious diseases outbreaks
- Weak performance of the local media in spreading the awareness about COVID-19 pandemic
- Poor healthcare infrastructure
- Insufficient supply of personal protective equipment (PPE)
- Lack of affordable hand sanitizers and facemasks for the public
- Inadequate financial resources for COVID-19 disease prevention and control
- Healthcare facilities in Yemen do not have protocols for controlling infectious outbreaks

Others, if you have other barriers for adequate control of COVID-19 in Yemen, please write them here:

.....

.....

.....
